# Supplementary material
Source: Elsevier journal article supplement (https://www.sciencedirect.com/science/article/pii/S021265672200035X)
Supplement: mmc1 [file S021265672200035X:mmc1.doc]

**Clinical Case**

Identification: Male 58, civil engineer, company manager.

Nuclear Family with 57-year-old wife. Duvall 7, Graffar high class, Excellent relationship with his wife and two children who are now married and living outside of Portugal and APGAR 8 (Highly functional family).

Personal background: Duodenal ulcer in 2007; UMA=10; 90 g alcohol per week; Low cardio-vascular risk; Low 10-year risk of diabetes. Daily physical activity at work.

National Immunization Plan is completed. Does quinquennial PN23 and has already made PN13.

Only child.

Family background: Father died at the age of 72 by a stroke; Mother alive at age 86 and institutionalized: obesity, demented, hypothyroidism, lower train arthritis.

**You have been following this man regularly and the last appointment was six months ago for a check-up.**

## **10/10/2019:**

S.

**Patient:** "I feel sad, uncomfortable, I prefer to be alone. I sleep poorly, I'm shuffling around in my head and even irritable. I've always been assertive…”

**Doctor(You):** “And do you have a reason to feel like that?" He answers: "In the last year I have been feeling a bit strange, but since ten days ago I feel worse because I had to close the company because of an embezzlement of my accountant... I lost the company and what worries me the most is that 7 people went unemployed and they’re all above 50’’.

**Doctor:** “What do you fear the most?” **Patient:** “To become like my mother.”

**Doctor: “**At the moment, how can I help you?” **Patient answers** “ Not to be in a depression or anxiety."

**Doctor:** “Do you think you are depressed or anxious?” **Patient** “No, of course not!”

O.

Sad mood, clenched facies, and little mimicry or gesturing. Sometimes irritation and exaltation in his speech. MMS=30, HADS depression=5 (Normal) and HADS anxiety=5 (Normal).

P.

**Doctor**: ‘’ Do you think you need pharmacological help?’’ **Patient:** “It’s up to you”.

We have scheduled an appointment for 2 weeks from now.

# How would you do the ICPC2 Classification? You can choose one or more codes. The sorting is done by alpha-numeric order.

## S:

P01: Feeling of anxiety / nervousness / tension

P02: Acute Stress Response

P03: feeling of depression

P04: Feeling / behaving irritable / angry

P27: Fear of mental disorder

Z05: Problem with work conditions

Z06: Unemployment problem

Z27: Fear of social problem

## A:

P01: Feeling of anxiety / nervousness / tension

P02: Acute Stress Response

P03: feeling of depression

P04: Feeling / behaving irritable / angry

P27: Fear of mental disorder

P74: Anxiety disorder / anxiety state

P76: Depressive Disorder

P99: Psychological disorder, other

Z05: Problem with work conditions

Z06: Unemployment problem

Z27: Fear of social problem

## P:

P48: Clarification / discussion of the reasons for consultation / request

P45: Observation / health education / counseling / diet

P50: Medications, treatments and therapeutic procedures

P58: Therapeutic counseling / therapeutic listening

Z48: Clarification / discussion of the reasons for consultation / request

Z45: Observation / health education / counseling / diet

Z50: Medications, treatments and therapeutic procedures

Z58: Therapeutic counseling / therapeutic listening

Other: If yes, which?

# **Please, tell us:**

# Years of professional practice:

≤5

6 to 10

11 to 15

16 to 25

≥26

Sex:

Female

Male

Professional situation:

General Medicine resident

Specialist

## If you are a specialist, did/do you have residents under your supervision?

Yes

No

## If you are a resident, in which year of residency are you?

1º

2º

3º

4º

## Work Unit Type:

Health Center

UCSP

USFA

USFB
